# Supplementary material for: Evaluation of Antimicrobial and Antibiofilm Activity of Citrus medica Fruit Juice Based Carbon Dots against Pseudomonas aeruginosa
Source: PubMed Central journal article supplement — ACS Omega. 2022 Oct 6;7(41):36227–34. doi: 10.1021/acsomega.2c03465 (PMC9583329; doi:10.1021/acsomega.2c03465), 2022-10-06
Supplement: ao2c03465_si_001.pdf [file ao2c03465_si_001.pdf]

## Supporting information

### Evaluation of Antimicrobial, Antibiofilm Activity of *Citrus medica* Fruit juice-based Carbon Dots against *Pseudomonas aeruginosa*

Nithya Selvaraju<sup>1</sup>, Pitchaipillai Sankar Ganesh<sup>2,\*</sup>, Veeramurali Palrasu<sup>3</sup>, Gunasekaran Venugopal<sup>1,\*</sup>, Vanitha Mariappan<sup>4,\*</sup>

<sup>1</sup>Advanced Nanomaterials and System Lab, Department of Materials Science, School of Technology, Central University of Tamil Nadu, Thiruvarur - 610005, Tamil Nadu, India

<sup>2</sup>Department of Microbiology, Saveetha Dental College and Hospital, Saveetha Institute of Medical and Technical Sciences (SIMATS), Velappanchavadi, PH Road, Chennai – 600 077, India.

<sup>3</sup>Department of Electronics, Government Arts College, Kulithalai, Karur (Dist), Tamil Nadu-639120, India

<sup>4</sup>Center for Toxicology and Health Risk Studies, Faculty of Health Sciences, Universiti Kebangsaan Malaysia, Jalan Raja Muda Abdul Aziz, Kuala Lumpur 50300, Malaysia

#### Corresponding Authors:

Dr. P. Sankar Ganesh, Department of Microbiology, Saveetha Dental College and Hospital, Saveetha Institute of Medical and Technical Sciences (SIMATS), Velappanchavadi, PH Road, Chennai, India. Email: [p\\_sankarganesh@hotmail.com](mailto:p_sankarganesh@hotmail.com)

Dr. Gunasekaran Venugopal, Advanced Nanomaterials and System Lab, Department of Materials Science, School of Technology, Central University of Tamil Nadu, Thiruvarur - 610005, Tamil Nadu, India. Email: [gunasekaran@cutn.ac.in](mailto:gunasekaran@cutn.ac.in) : [pvsguna@gmail.com](mailto:pvsguna@gmail.com)

Dr. Vanitha Mariappan, Center for Toxicology and Health Risk Studies, Faculty of Health Sciences, Universiti Kebangsaan Malaysia, Jalan Raja Muda Abdul Aziz, Kuala Lumpur 50300, Malaysia Email: [vanitha.ma@gmail.com](mailto:vanitha.ma@gmail.com)

**Photostability of CQDs:**

**Figure S1. Photostability test for 3 hrs at an interval 15 min**

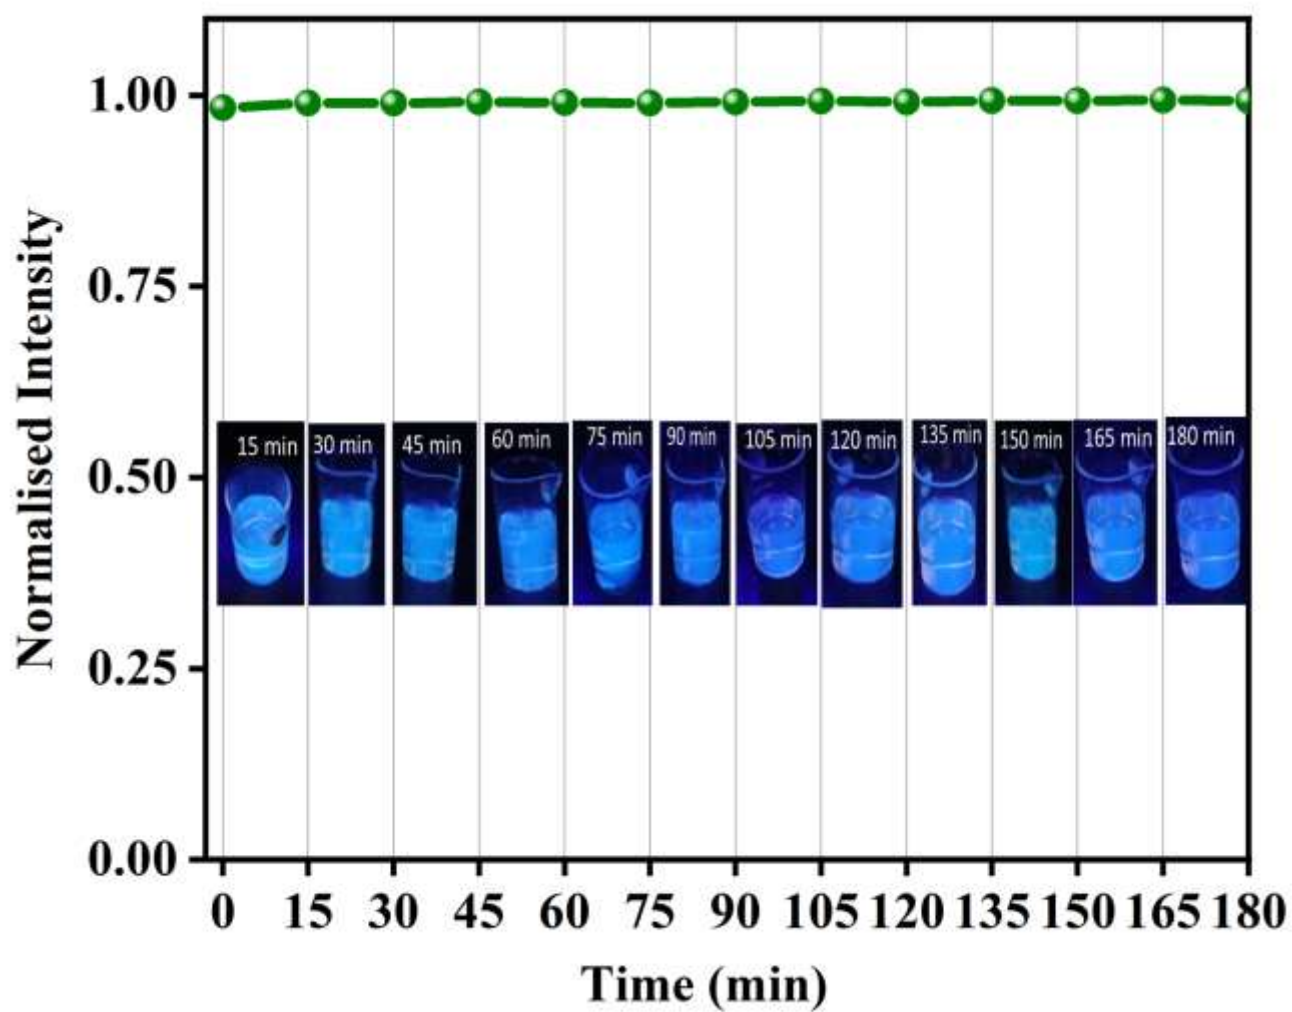

Figure S2. Photostability test for 24 hrs

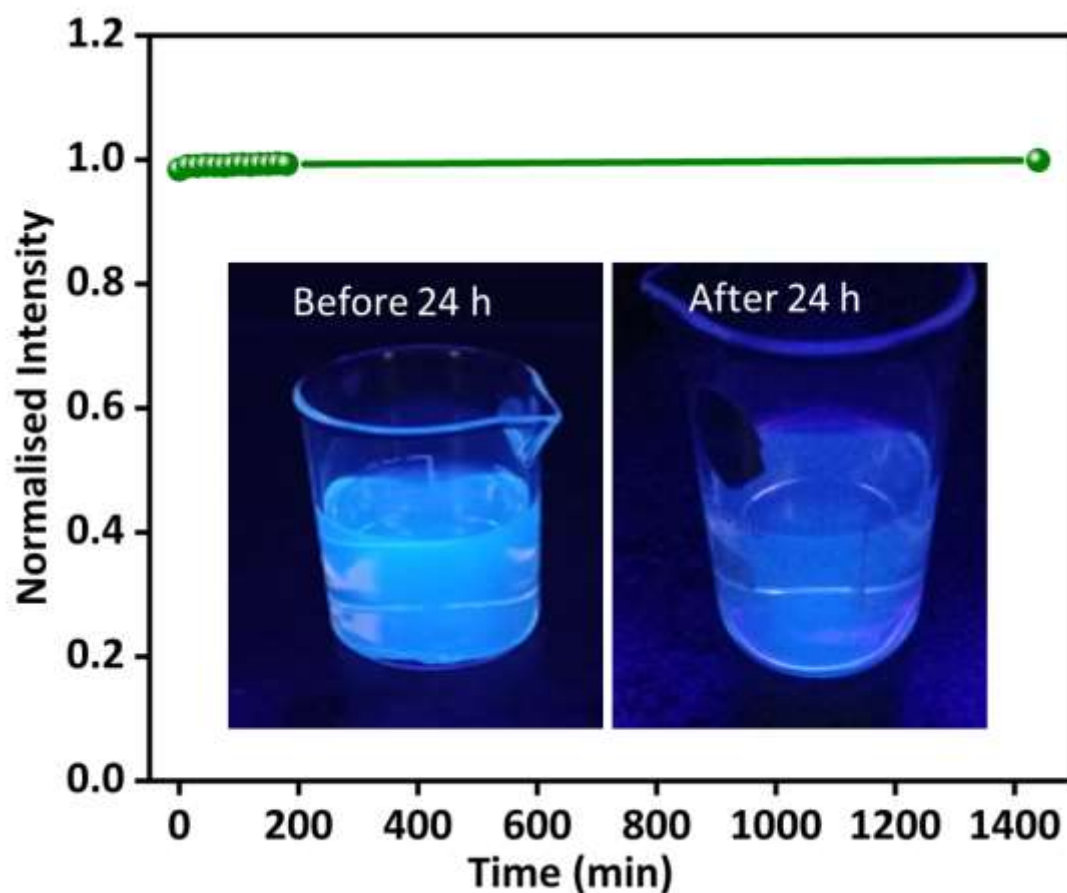

#### Measurements of fluorescence quantum yield:

The Quantum Yield of carbon quantum dots (CQDs) was calculated using the following formula

$$QY = QY_R \frac{I_s A_R (n_s)^2}{I_R A_s (n_R)^2}$$

Quinine sulfate (QS) were used as the reference material in 0.1 M H<sub>2</sub>SO<sub>4</sub> and the reference quantum yield is 0.54 at 350 nm where I<sub>R</sub> and I<sub>S</sub> denotes the integrated fluorescent emission intensity of the QS and CQD, where A<sub>R</sub> and A<sub>S</sub> is the absorbance, n<sub>R</sub> and n<sub>S</sub> and is the refractive index of the solvent of QS and CQDs, respectively.

**Table ST1:** Minimum inhibitory concentration (MIC) of naturally derived carbon dots against the clinical isolates of *P. aeruginosa* and control strain of *P. aeruginosa* PAO1

| <b>Concentration<br/>(CDs)</b> | <b><i>P. aeruginosa</i><br/>MIC (%v/v)</b> | <b><i>P. aeruginosa</i> PAO1<br/>MIC (%v/v)</b> |
|--------------------------------|--------------------------------------------|-------------------------------------------------|
| 10%                            | MIC                                        | MIC                                             |
| 5%                             | MIC                                        | MIC                                             |
| 2.5%                           | MIC                                        | MIC                                             |
| <b>1.25%</b>                   | <b>MIC</b>                                 | <b>MIC</b>                                      |
| 0.625%                         | Growth                                     | Growth                                          |
| 0.3125%                        | Growth                                     | Growth                                          |
| 0.156%                         | Growth                                     | Growth                                          |
| 0.078%                         | Growth                                     | Growth                                          |
| 0.039%                         | Growth                                     | Growth                                          |
| 0.019%                         | Growth                                     | Growth                                          |

**Table ST2:** Antibigram pattern of *P. aeruginosa* based on Kirby-Bauer method (1996)

| Antibiotics                 | Antibiotics Average $\pm$ standard deviation value |                 |                 |                |                 |
|-----------------------------|----------------------------------------------------|-----------------|-----------------|----------------|-----------------|
|                             | SDC-01                                             | SDC-02          | SDC-03          | SDC-04         | SDC-05          |
| Ciprofloxacin               | 36.0 $\pm$ 0.1                                     | 37.02 $\pm$ 0.1 | 36.02 $\pm$ 0.2 | 37.0 $\pm$ 5.1 | 37.0 $\pm$ 5.1  |
| Gatifloxacin                | R                                                  | 36.05 $\pm$ 0.4 | 37.5 $\pm$ 0.1  | 37.0 $\pm$ 1.7 | 27.02 $\pm$ 0.2 |
| Tobramycin                  | 27.0 $\pm$ 0.2                                     | 27.02 $\pm$ 0.2 | 26.3 $\pm$ 1.1  | 26.0 $\pm$ 1.7 | 27.0 $\pm$ 0.2  |
| Mezolocillin                | R                                                  | 22.0 $\pm$ 1.7  | 17.6 $\pm$ 2.5  | R              | R               |
| Azlocillin                  | 23.6 $\pm$ 0.2                                     | R               | 22.03 $\pm$ 0.1 | R              | 28.6 $\pm$ 2.3  |
| Ofloxacin                   | 29.3 $\pm$ 0.5                                     | 26.0 $\pm$ 1.7  | 28.6 $\pm$ 2.3  | 30.0 $\pm$ 1.0 | 29.6 $\pm$ 0.2  |
| Pipercecillin/Tazobactam    | R                                                  | 27.0 $\pm$ 1.7  | 29.0 $\pm$ 1.0  | R              | R               |
| Ceftriaxone                 | 23.3 $\pm$ 2.8                                     | 18.3 $\pm$ 2.8  | 17.6 $\pm$ 0.1  | R              | 17.6 $\pm$ 0.5  |
| Amikacin                    | 24.3 $\pm$ 1.1                                     | 23.3 $\pm$ 0.5  | 22.6 $\pm$ 1.1  | 20 $\pm$ 0     | 17.6 $\pm$ 2.5  |
| Netillin                    | 19.3 $\pm$ 0.2                                     | 17.6 $\pm$ 0.5  | 20.3 $\pm$ 0.5  | 17.6 $\pm$ 0.5 | 20.3 $\pm$ 0.5  |
| Norfloxacin                 | R                                                  | 34.6 $\pm$ 0.5  | R               | 34.6 $\pm$ 0.5 | 36.05 $\pm$ 0.4 |
| Gentamicin                  | 23.0 $\pm$ 0.2                                     | 20 $\pm$ 0      | 20 $\pm$ 0.1    | 20 $\pm$ 0     | 26.0 $\pm$ 1.7  |
| Garbenicillin               | 24.3 $\pm$ 1.1                                     | 27.6 $\pm$ 2.0  | 25.3 $\pm$ 0.5  | R              | R               |
| Peperacillin                | R                                                  | 24.0 $\pm$ 1.7  | R               | R              | 28.6 $\pm$ 2.3  |
| Ticarcillin/Clavulanic Acid | 21.0 $\pm$ 0.7                                     | 19.3 $\pm$ 0.5  | R               | R              | 17.6 $\pm$ 2.5  |
